# Supplementary material for: A polyfluorene-based electrolyte membrane for hydrogen/oxygen gas separation under humidified conditions
Source: Royal Society of Chemistry journal article supplement (doi:10.1039/d4se01692k), 2025-01-01

Polyfluorene-based electrolyte membrane for hydrogen/oxygen gas separation under humidified  
conditions

Shoji Miyanishi\*<sup>†</sup>, Kaede Matsuta<sup>†</sup>, Takeo Yamaguchi\*<sup>†</sup>

<sup>†</sup>Laboratory for Chemistry and Life Science Institute of Innovative Research, Tokyo Institute of  
Technology, R1-17, 4259, Midori-ku, Yokohama, Kanagawa, 226-8503, Japan

Corresponding author: [yamag@res.titech.ac.jp](mailto:yamag@res.titech.ac.jp)

**Contents**

Figure S1. <sup>1</sup>H-NMR spectra of the monomer

Figure S2. <sup>1</sup>H-NMR and <sup>19</sup>F-NMR spectra of the polymers

Table S1. Molecular weight of the polymers

Figure S3. Stress-strain curve of the membranes

Figure S4. Chemical structure of the membranes shown in Table 1

Figure S5. Stability of hydrogen permeability in PFST-C<sub>8</sub>-SO<sub>3</sub>H membrane at 80 °C RH90%

Figure S1. <sup>1</sup>H-NMR spectra of the monomers

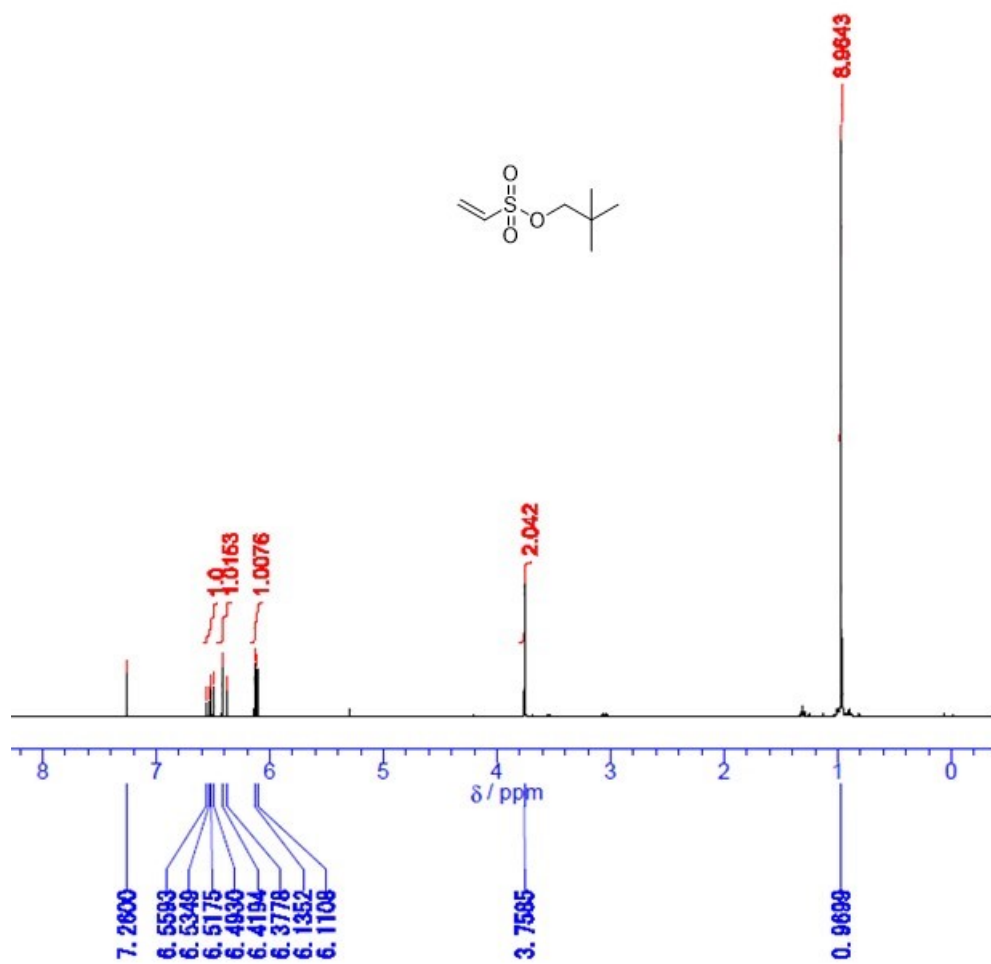

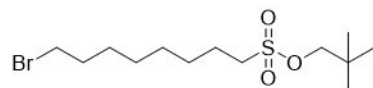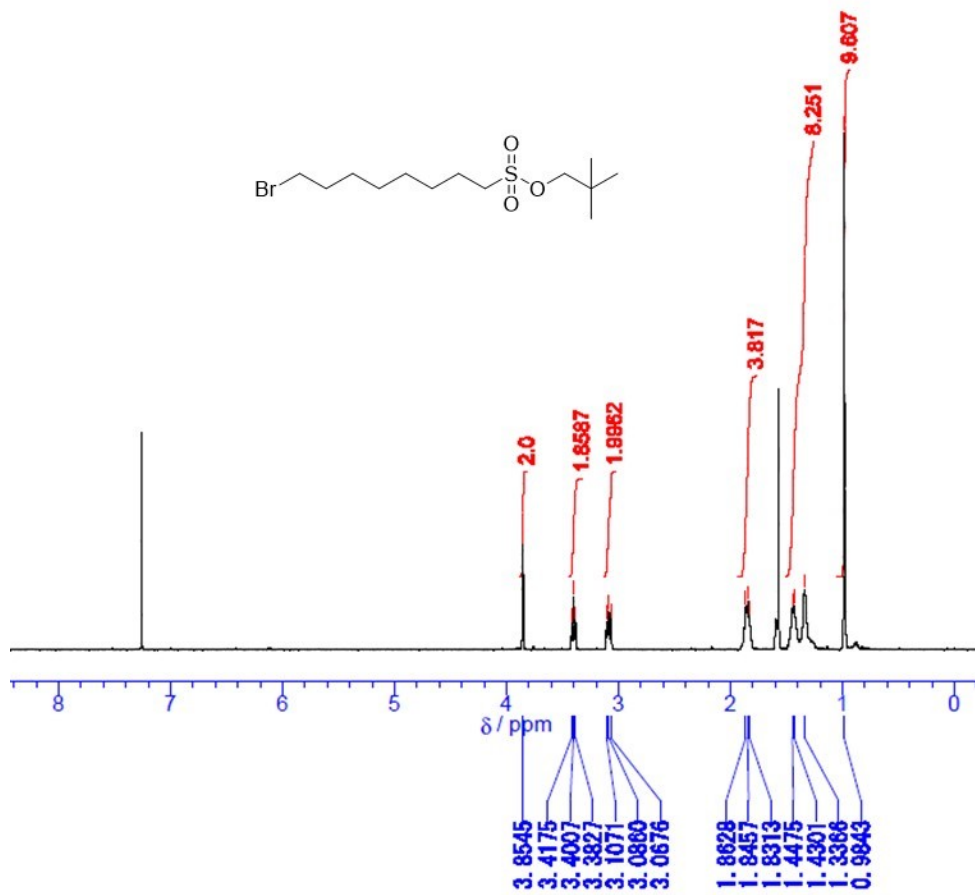

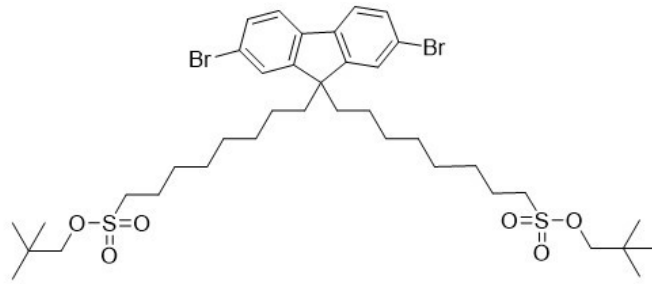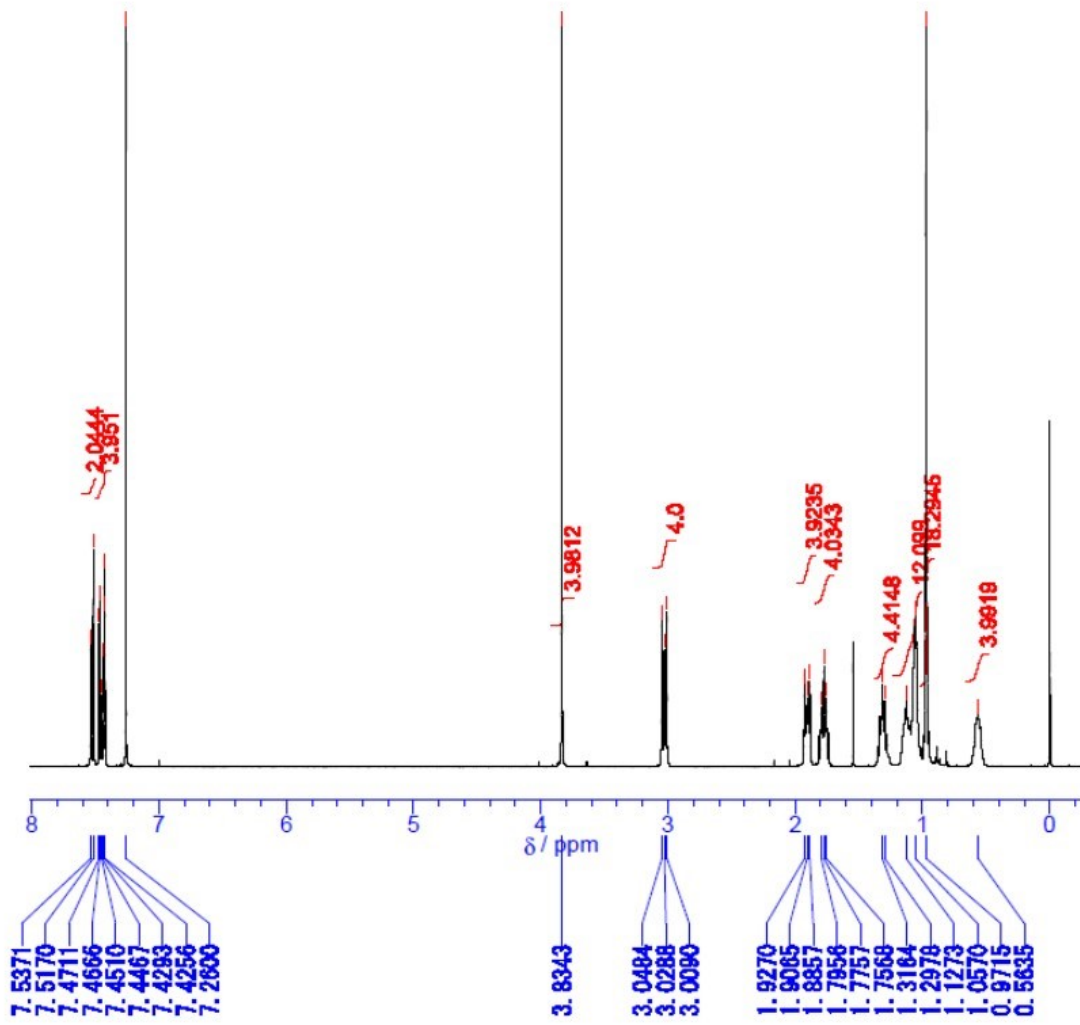

Figure S2.  $^1\text{H}$ -NMR spectra and  $^{19}\text{F}$ -NMR spectra of PFT- $\text{C}_8$ -SNp (a, b) and PFST- $\text{C}_8$ -SNp(c, d) before and after deprotection of neopentyl ester group. The peaks indicated by red arrows are derived from aromatic protons of 2,2'-spirobifluorene

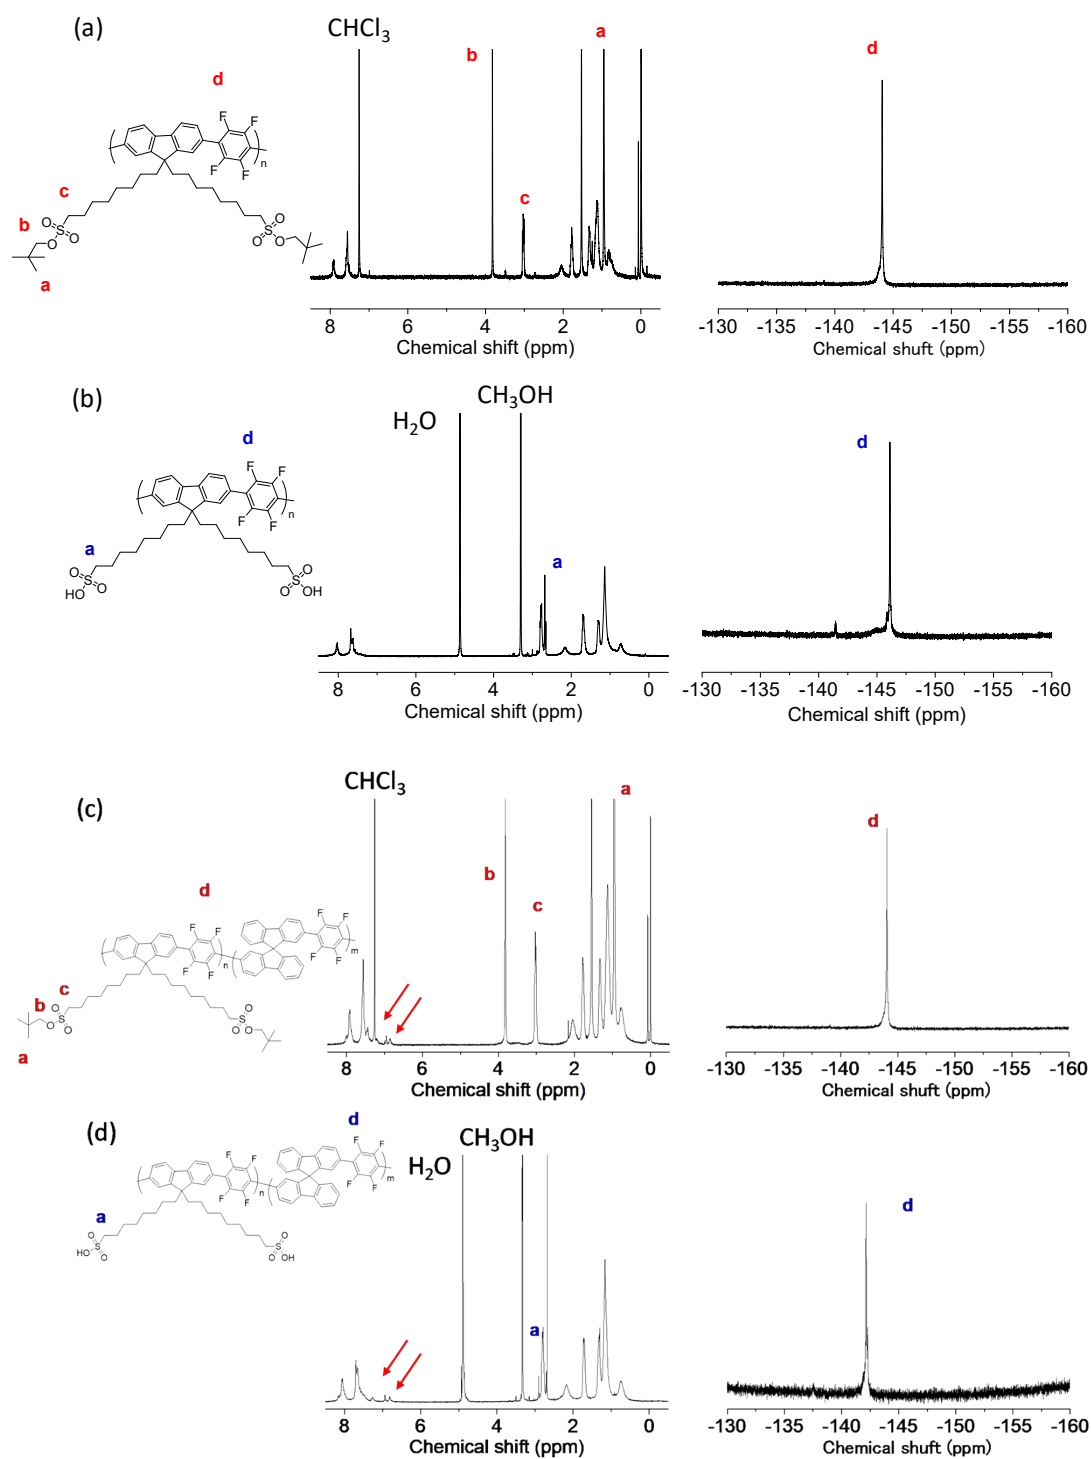

Table S1 Molecular weight of the polymers

| Polymer                                 | $M_n$ (kDa) | $M_w$ (kDa) | Polydispersity |
|-----------------------------------------|-------------|-------------|----------------|
| PFT-C <sub>8</sub> -SO <sub>3</sub> Np  | 50.9        | 224         | 4.4            |
| PFST-C <sub>8</sub> -SO <sub>3</sub> Np | 31.3        | 150         | 4.8            |

Figure S3. Stress-strain curve of the membranes

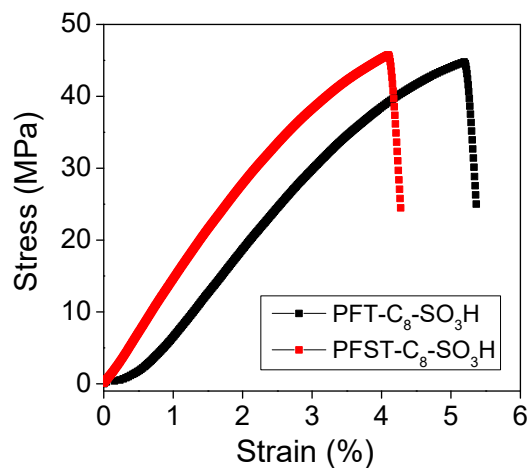

Figure S4. Chemical structure of the membranes shown in Table 1

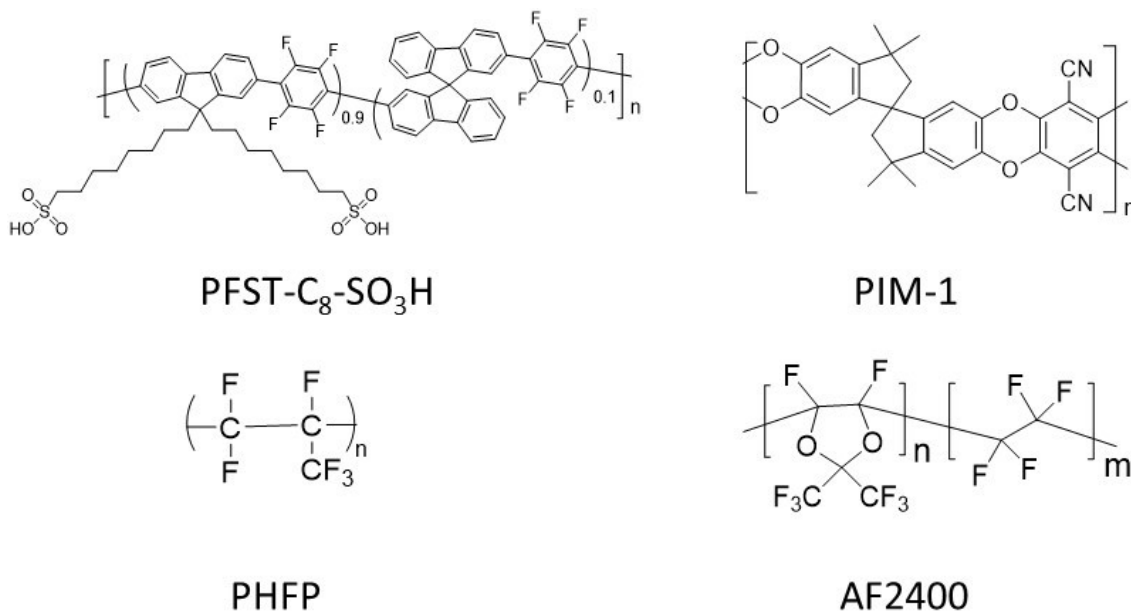

Figure S5. Stability of hydrogen permeability in PFST-C<sub>8</sub>-SO<sub>3</sub>H membrane at 80 °C RH90%

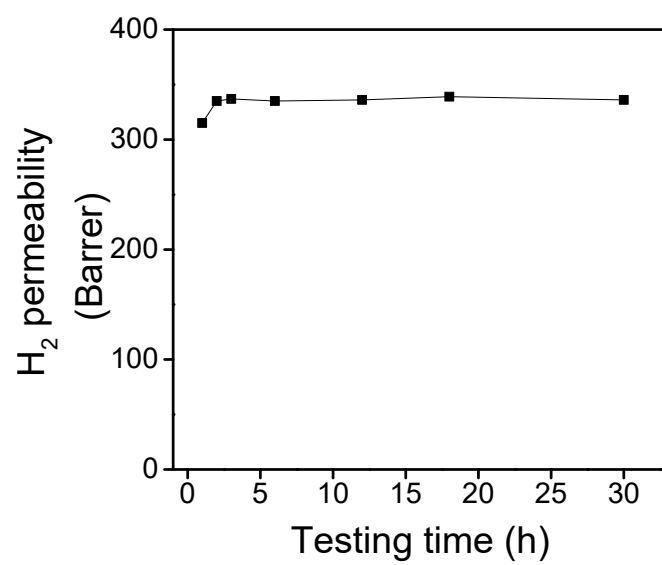

Supplement: d4se01692k1.pdf [file d4se01692k1.pdf]
